# Supplementary material for: Synthesis of amphiphilic semigrafted pseudo-Pluronics for self-assemblies carrying indomethacin
Source: Royal Society of Chemistry journal article supplement (doi:10.1039/c6ra20368j), 2016-01-01
Supplement: c6ra20368j1.pdf [file c6ra20368j1.pdf]

## Electronic Supplementary Information

### Synthesis of amphiphilic semigrafted pseudo-Pluronics for self-assemblies carrying Indomethacin

P. Maksym and D. Neugebauer

Department of Physical Chemistry and Technology of Polymers

Faculty of Chemistry

Silesian Technical University

M. Strzody 9, Gliwice, 44-100, Poland

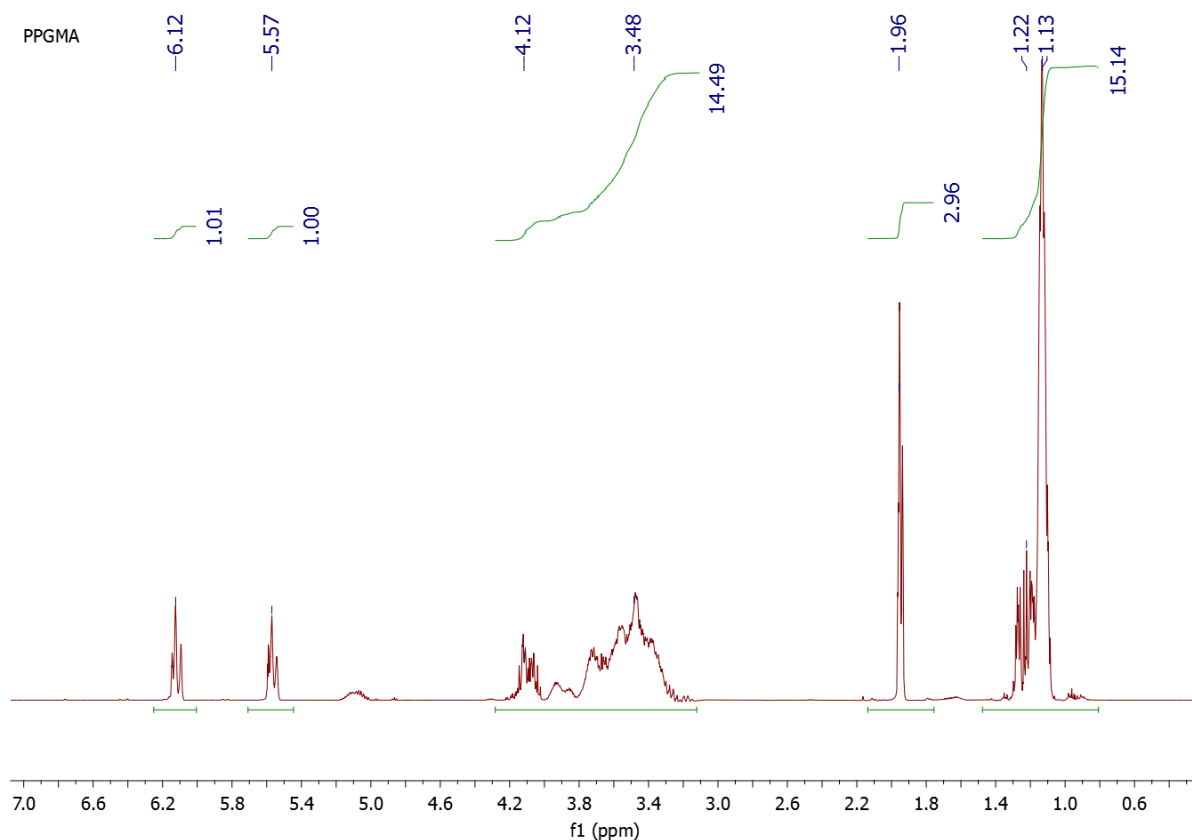

**Fig. S1.** <sup>1</sup>H NMR spectra of OPGMA macromonomer

<sup>1</sup>H-NMR ( $\delta$ , ppm, 300 MHz, CDCl<sub>3</sub>): 0.8-1.5 (3H, CCH<sub>3</sub> in OPG side chains), 1.96 (3H, CH<sub>3</sub>C=), 3.1-4.3 (2H+1H, OCH<sub>2</sub>CHO), 5.57 and 6.12 (s, 1H+1H, CH<sub>2</sub>=C).
